# Supplementary material
Source: PubMed Central journal article supplement (PMC3903462)
Supplement: NIHMS511429-supplement-1_si_001.pdf [file NIHMS511429-supplement-1_si_001.pdf]

## SUPPORTING INFORMATION

The lid domain of the MCP hydrolase DxnB2 contributes to an increased specificity for recalcitrant PCB metabolites.

Antonio C. Ruzzini<sup>†,‡</sup>, Shiva Bhowmik<sup>§,‡,⊥</sup>, Katherine C. Yam<sup>†</sup>, Subhangi Ghosh<sup>§</sup>, Jeffrey T. Bolin<sup>§,\*</sup>, and Lindsay D. Eltis<sup>†,||,\*</sup>.

<sup>§</sup>Purdue Cancer Research Center and Markey Center for Structural Biology, Department of Biological Sciences, Purdue University, West Lafayette, IN, USA

<sup>†</sup>Department of Biochemistry and Molecular Biology, University of British Columbia, BC, Canada

<sup>||</sup>Department of Microbiology and Immunology, University of British Columbia, BC, Canada

<sup>‡</sup>These authors contributed equally.

<sup>⊥</sup>Present Address: Department of Integrative Structural and Computational Biology, The Scripps Research Institute, 10550 North Torrey Pines Road, La Jolla, CA 92037.

\*Corresponding authors  
Jeffrey T. Bolin – [jtb@purdue.edu](mailto:jtb@purdue.edu)  
Lindsay D. Eltis – [leltis@mail.ubc.ca](mailto:leltis@mail.ubc.ca)

---

### Table of Contents

---

#### **Experimental**

HPLC analysis of DxnB2-mediated hydrolysis of 3-Cl HOPDAs S2

#### **Results**

HPLC analysis of DxnB2-mediated hydrolysis of 3-Cl HOPDA S2

SEC-MALS analysis of three MCP hydrolases S3

MCP hydrolase structure-guided sequence alignment S4

---

**HPLC analysis of DxnB2-mediated hydrolysis of 3-Cl HOPDAs.** Reactions were analyzed using a Waters 2695 HPLC system (Waters Corp., Milford, MA) equipped with a Hewlett-Packard ODS Hypersil C<sub>18</sub> column (5  $\mu$ m, 125 mm  $\times$  4 mm) operating at a flow rate of 1 mL/min and equilibrated at 90% solvent A (0.5% H<sub>3</sub>PO<sub>4</sub> in H<sub>2</sub>O) and 10 % solvent B (methanol). Reactions of 2 mM DxnB2 with 100  $\mu$ M 3-Cl or 50  $\mu$ M 3,9,11-triCl HOPDA were carried out in potassium phosphate ( $I = 0.1$  M), pH7.5, quenched with H<sub>3</sub>PO<sub>4</sub> (0.5% v/v) and passed through a 0.45  $\mu$ m filter prior to injection. Samples were eluted using two sequential gradients: (i) 10 to 30% B from 0 to 20 min and (ii) 30 to 60% B from 20 to 80 minutes. Retention times were 4.8 min for 2-hydroxy-3-chloro-2,4-pentadienoic acid ( $\lambda_{\text{max}}$  244 nm), 14.8 min for benzoic acid ( $\lambda_{\text{max}}$  229 nm), and 51.3 min for 3,5-dichlorobenzoic acid ( $\lambda_{\text{max}}$  234 nm).

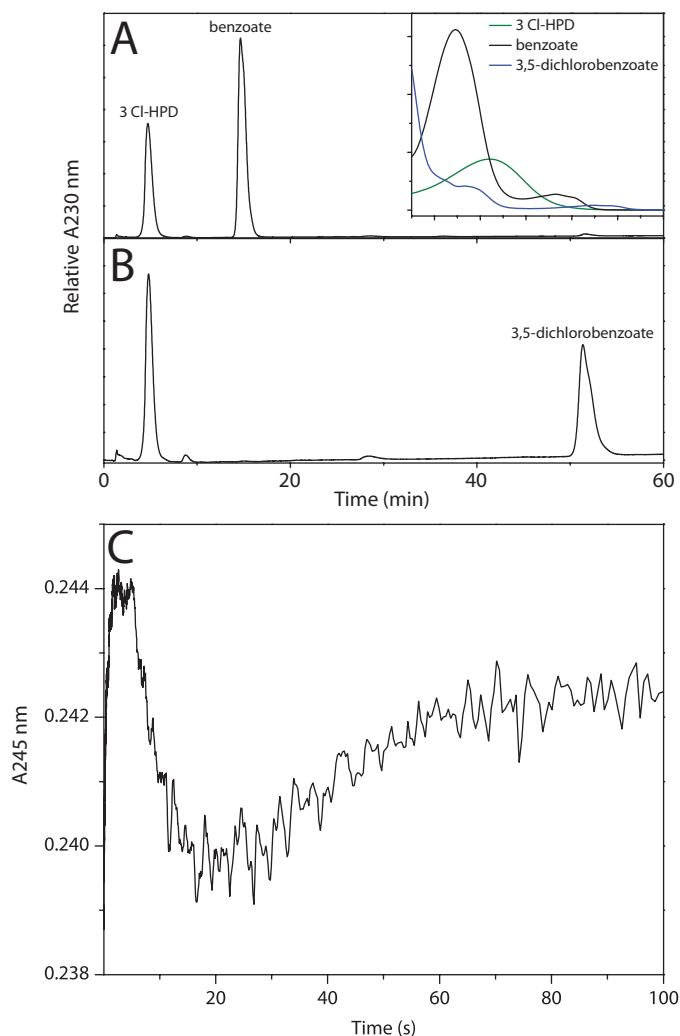

**Figure S1.** HPLC chromatograms of DxnB2-mediated hydrolysis of 3-Cl HOPDA (A) and 3,9,11-triCl HOPDA (B). The electronic absorbance spectrum of each distinct product is inset in (A). (C) A representative stopped-flow experiment monitoring turnover of 3-Cl HOPDA at 245 nm. The multiphasic nature and poor signal-to-noise were not interpreted since they may be partly attributed to several product species.

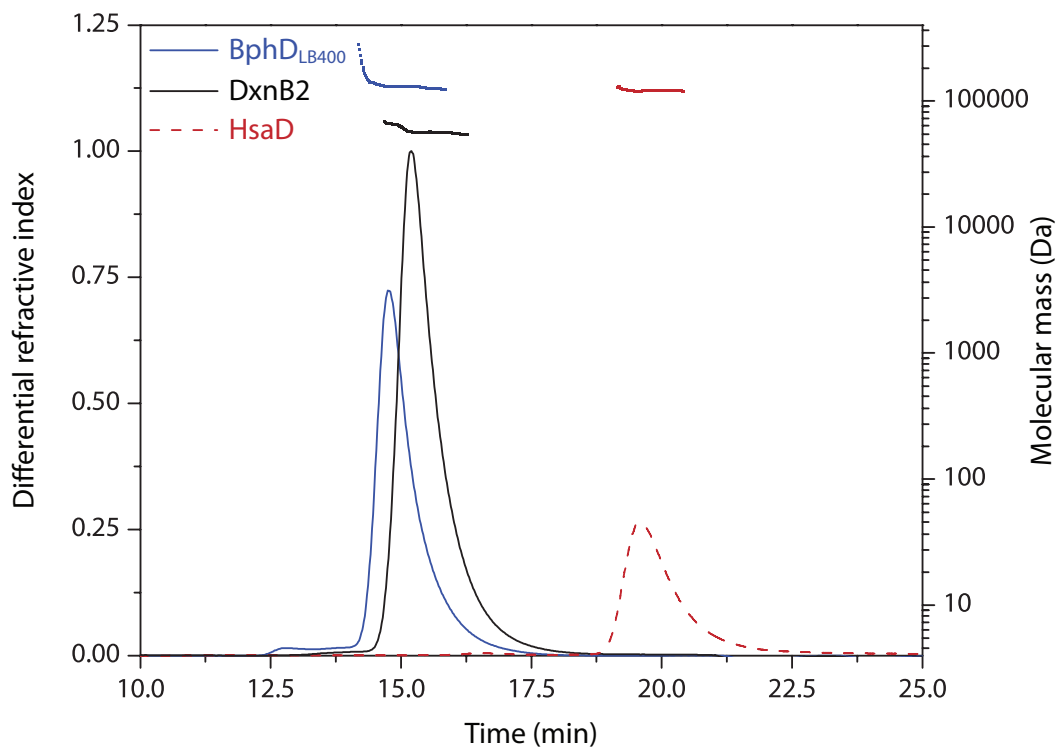

**Figure S2.** Superposition of chromatograms from SEC-MALS analysis of BphD<sub>LB400</sub> (blue), DxnB2 (black), and HsaD (red). The data used for molecular mass determination has been overlaid on the chromatogram.

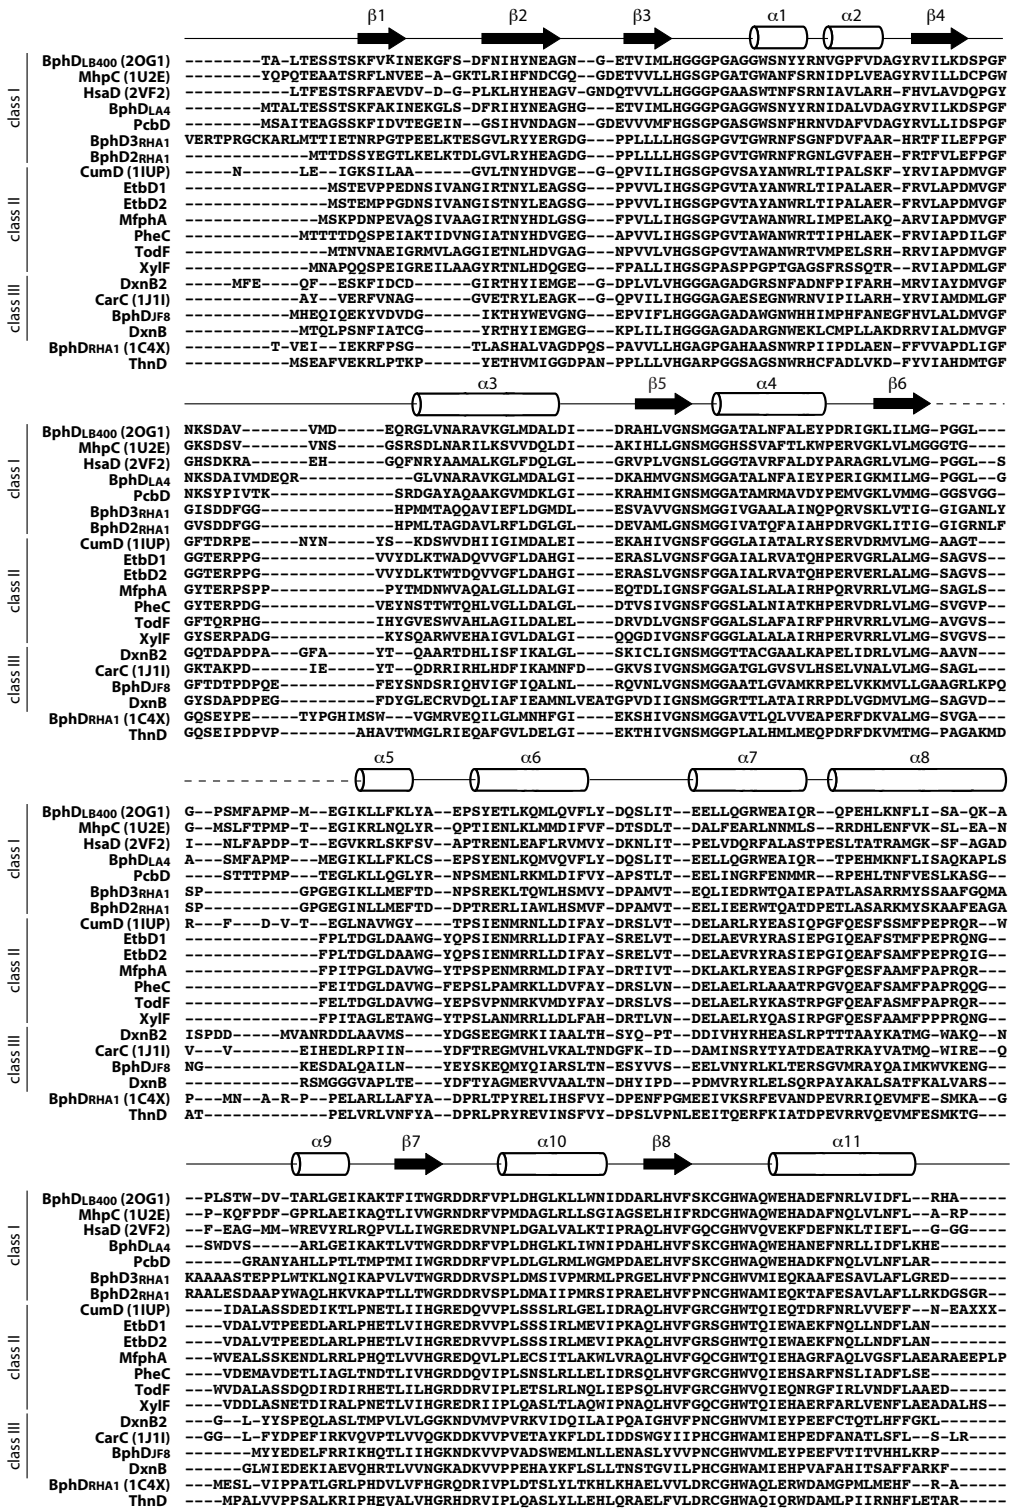

**Figure S3.** Sequence alignment resulting from the structural superposition of seven MCP hydrolases. The NC-loop is indicated by a dashed line and the secondary structural elements are numbered. The helix labeled 11 might also be considered a pair of shorter helices joined by a turn. For PDB IDs and biological source refer to Materials and Methods.
